# Supplementary material for: Spin probe method of electron paramagnetic resonance spectroscopy – a qualitative test for measuring the evolution of dry eye syndrome under treatment
Source: Royal Society of Chemistry journal article supplement (doi:10.1039/c8ay02783h), 2019-01-01
Supplement: c8ay02783h1.pdf [file c8ay02783h1.pdf]

## **Spin probe method of electron paramagnetic resonance spectroscopy – a qualitative test for measuring the evolution of dry eye syndrome under treatment**

Mihaela Monica Constantin,<sup>a</sup> Catalina Gabriela Corbu,<sup>a,b,c</sup> Cristiana Tanase,<sup>d,e</sup> Elena Codrici,<sup>d</sup> Simona Mihai,<sup>d</sup> Ionela Daniela Popescu,<sup>d</sup> Ana-Maria Enciu,<sup>d,f</sup> Sorin Mocanu,<sup>g</sup> Iulia Matei,<sup>g</sup> and Gabriela Ionita<sup>\*g</sup>

<sup>a</sup> Clinical Hospital of Ophthalmologic Emergencies, Alexandru Lahovari 1 Square, Bucharest, Romania

<sup>b</sup> Oftaclinic Clinic, Bd. Marasesti 2B, Bucharest, Romania

<sup>c</sup> Division of Ophthalmology, Faculty of Medicine, "Carol Davila" University of Medicine and Pharmacy, Bulevardul Eroii Sanitari 8, 050474 Bucharest, Romania

<sup>d</sup> "Victor Babes" National Institute of Pathology, Biochemistry-Proteomics Department, Splaiul Independentei 99-101, 050096 Sector 5, Bucharest, Romania

<sup>e</sup> Faculty of Medicine, "Titu Maiorescu" University, Strada Dâmbovicului 22, 040441, Sector 4, Bucharest, Romania

<sup>f</sup> "Carol Davila" University of Medicine and Pharmacy, Cellular and Molecular Medicine Department, no. 8 B-dul Eroilor Sanitari, 050474 Sector 5, Bucharest, Romania

<sup>g</sup> "Ilie Murgulescu" Institute of Physical Chemistry of the Romanian Academy, 202 Splaiul Independentei 060021, Bucharest, Romania

Corresponding author: Gabriela Ionita, "Ilie Murgulescu" Institute of Physical Chemistry of the Romanian Academy, 202 Splaiul Independentei 060021, Bucharest, Romania. E-mail: ige@icf.ro

**Table S1** Spearman correlations and probability values (p, in parentheses) of protein levels with ophthalmic parameters for **N** group

| Protein     | OSDI              | Schirmer          | BUT               |
|-------------|-------------------|-------------------|-------------------|
| TP (mg/ml)  | 0.500<br>(0.666)  | 0.558<br>(0.094)  | 0.063<br>(0.86)   |
| ALB (µg/ml) | 0.500<br>(0.666)  | -0.608<br>(0.062) | -0.775<br>(0.029) |
| LYZ (mg/ml) | 0.265<br>(0.562)  | 0.752<br>(0.019)  | -0.380<br>(0.317) |
| LF (mg/ml)  | -0.680<br>(0.036) | 0.149<br>(0.701)  | 0.156<br>(0.688)  |

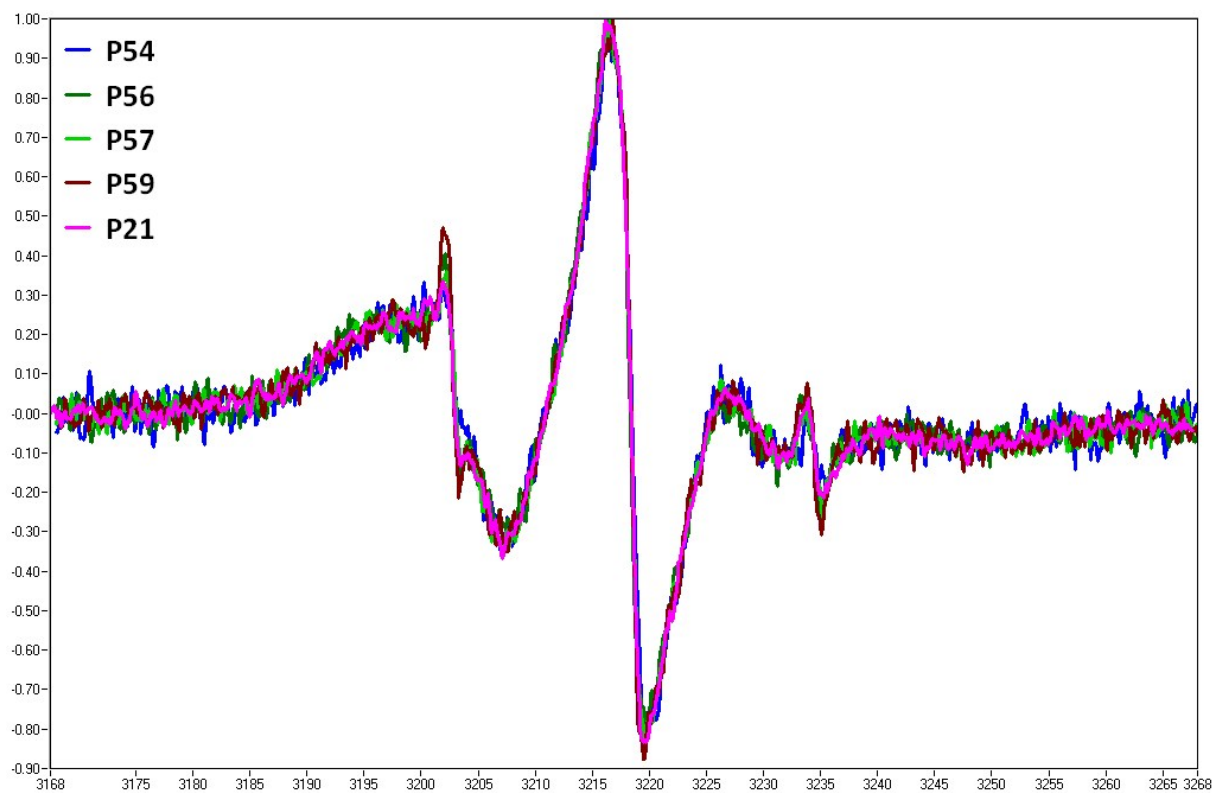

**Fig. S1** EPR spectra of 5-DSA in tear secretions from patients with normal eyes.

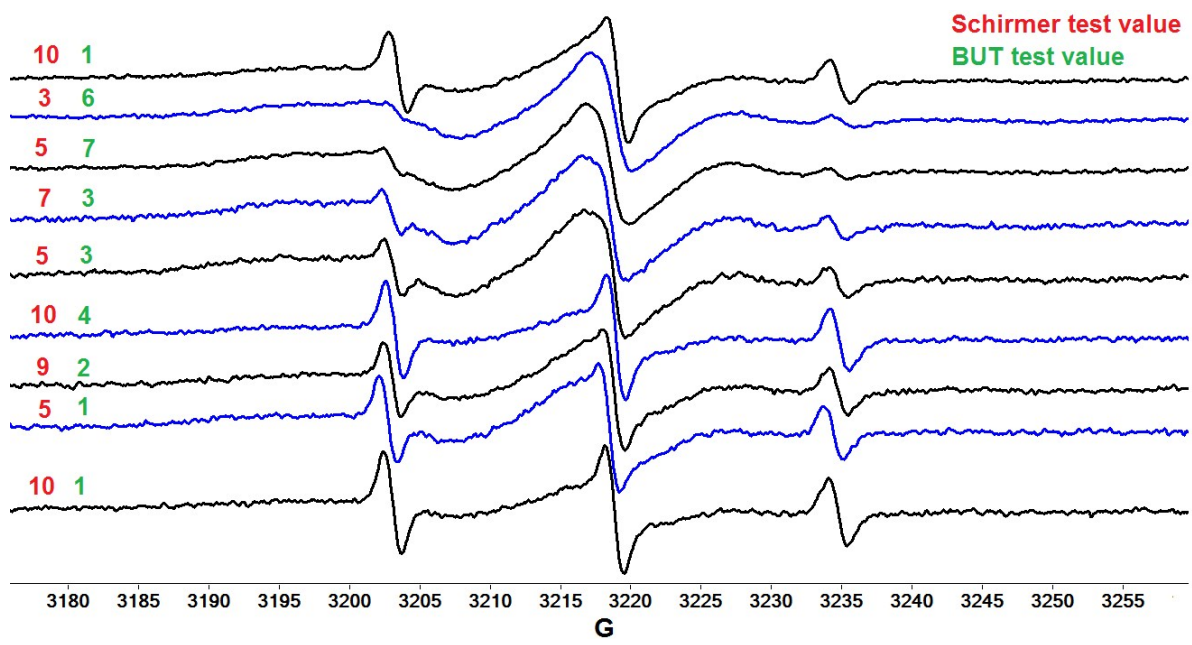

**Fig. S2** EPR spectra of 5-DSA in tear secretions from patients with dry eye.
